# Supplementary material for: Extracellular contractile injection systems for high efficiency protein delivery to plants
Source: Research Square preprint supplement (doi:10.21203/rs.3.rs-7412028/v1), 2025-08-26
Supplement: Supplementary file 1 [file 793571d0260f799ace804f3d.docx]

**SUPPLEMENTARY FIGURES**

**Extracellular contractile injection systems for high efficiency protein delivery to plants**

Mark G. Legendre1, Carlos A. Heredia1, Clair Colee1, Gozde S. Demirer1,#

1Chemistry and Chemical Engineering Division, California Institute of Technology, Pasadena, CA, USA

#corresponding author: gdemirer@caltech.edu

**
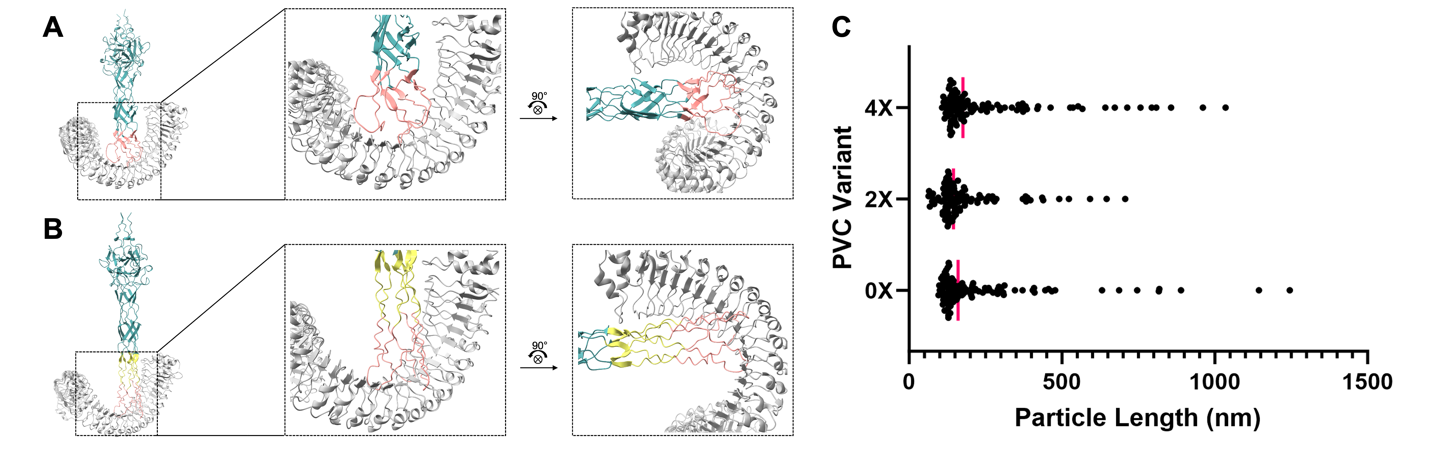
**

**Supplementary Figure 1. Flg22 epitope alignments and size distributions of PVC variants. (A)** ChimeraX alignment of the flg22 epitope (salmon) from the 0xlinker PVC variant AlphaFold-predicted tail fiber body (teal) to the flg22 peptide in the FLS2–flg22 crystal structure (PDB: 4MN8, gray). **(B)** ChimeraX alignment of the flg22 epitope (salmon) from the 2xlinker PVC variant AlphaFold-predicted structure (tail fiber body, teal; linker, yellow) to the flg22 peptide in the FLS2–flg22 crystal structure (PDB: 4MN8, gray). **(C)** Length distribution of n = 100 PVCs for each member of the FLS2-binding PVC library (the 0x, 2x, and 4x linker variants). Vertical red bars represent data medians (0X: 160.8 nm, 95% CI [136.2-203.1]; 2X: 145.6 nm, 95% CI [130.3-158.4]; 4X: 176.0 nm, 95% CI [157.6-204.4]).


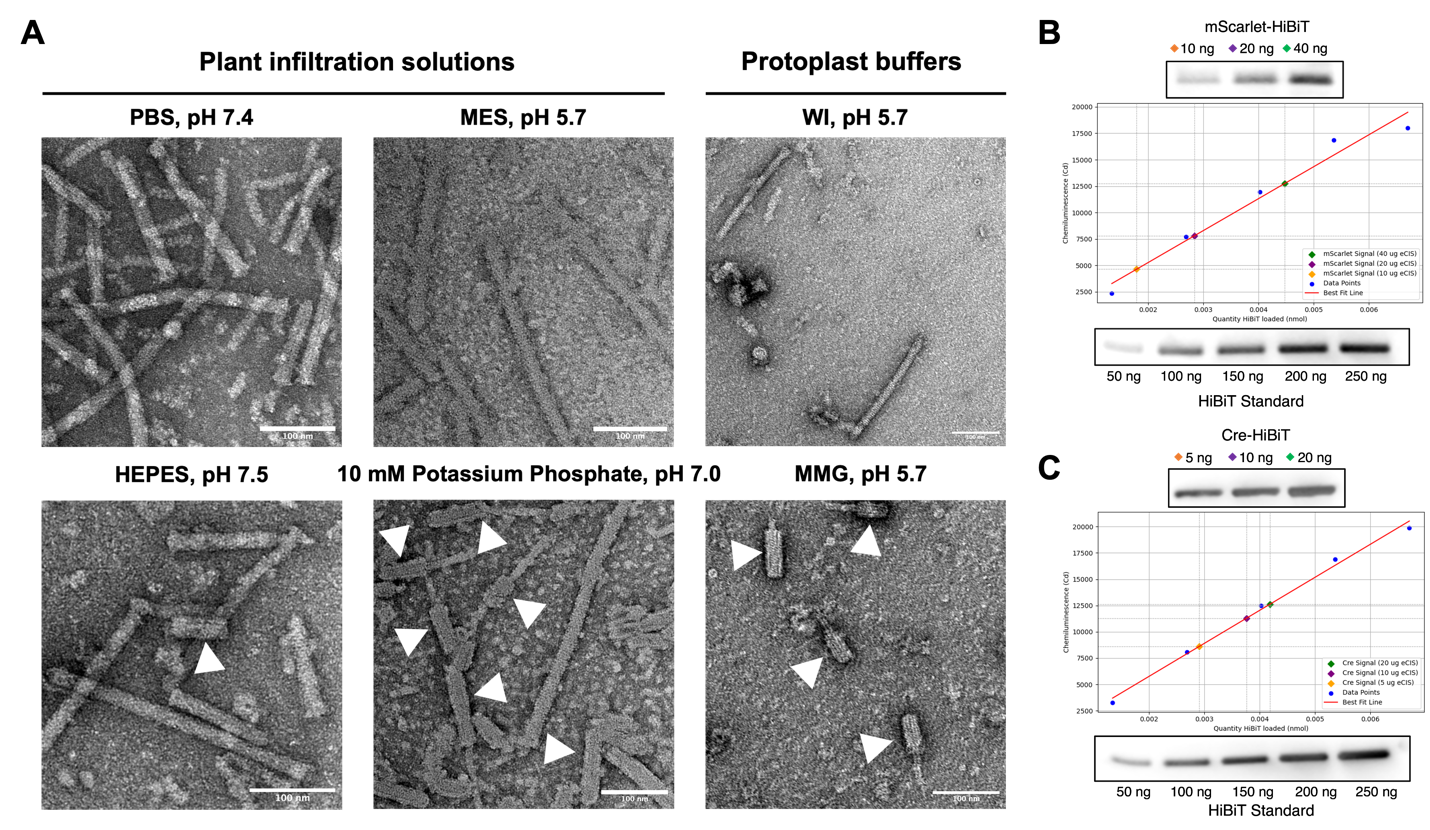


**Supplementary Figure 2. Characterizing PVC cargo loading capacity and stability. (A)** Representative negative stain TEM images of PVCs prepared in various suspension buffers. White arrows indicate contracted PVC sheaths. Scale bar, 100 nm. **(B)** Denaturing western blot band intensity analysis on PVCs loaded with mScarlet protein tagged with HiBiT. Band intensities measured using FIJI image processing package and a standard linear regression performed on a HiBiT standard (Promega N3010). **(C)** Denaturing western blot band intensity analysis on PVCs loaded with Cre recombinase tagged with HiBiT. Band intensities measured using FIJI image processing package and a standard linear regression performed on a HiBiT standard.


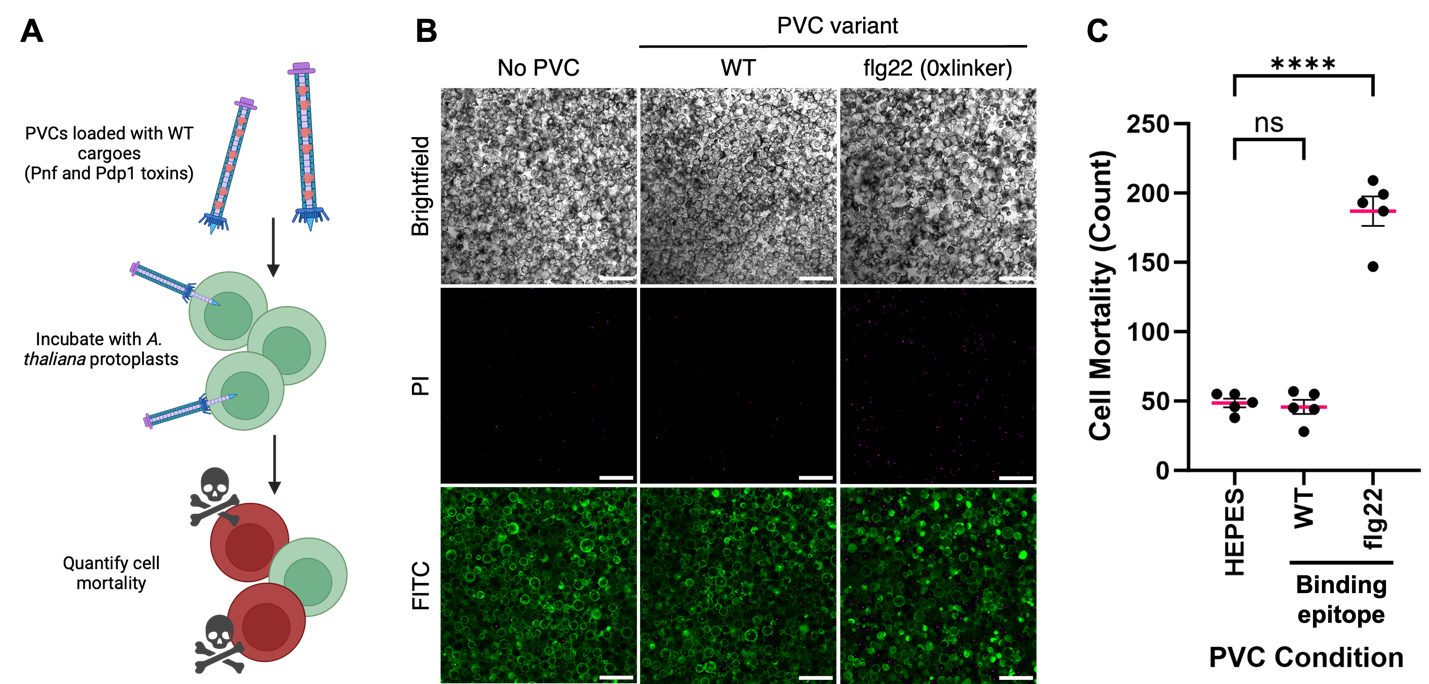


**Supplementary Figure 3. FLS2-targeting PVCs deliver WT payloads to plant cells. (A)** Schematic of PVC-mediated toxin effector delivery in *A. thaliana* protoplasts, where cell mortality is measured using a propidium iodide (PI)/fluorescein isothiocyanate (FITC) live/dead stain. **(B)** Representative confocal microscopy images of *A. thaliana* protoplasts stained (PI/FITC) 24 h following challenge with PVCs harboring toxin payloads. Scale bar, 200 nm. **(C)** Quantification of cell mortality (defined as number of PI-stained nuclei) from confocal images for HEPES buffer control, no binding control, and a 0xlinker PVC experimental sample. Data are mean ± SEM with n = 5 biological replicates, one-way ANOVA with Tukey post hoc test. ****P < 0.0001. ns, not significant.


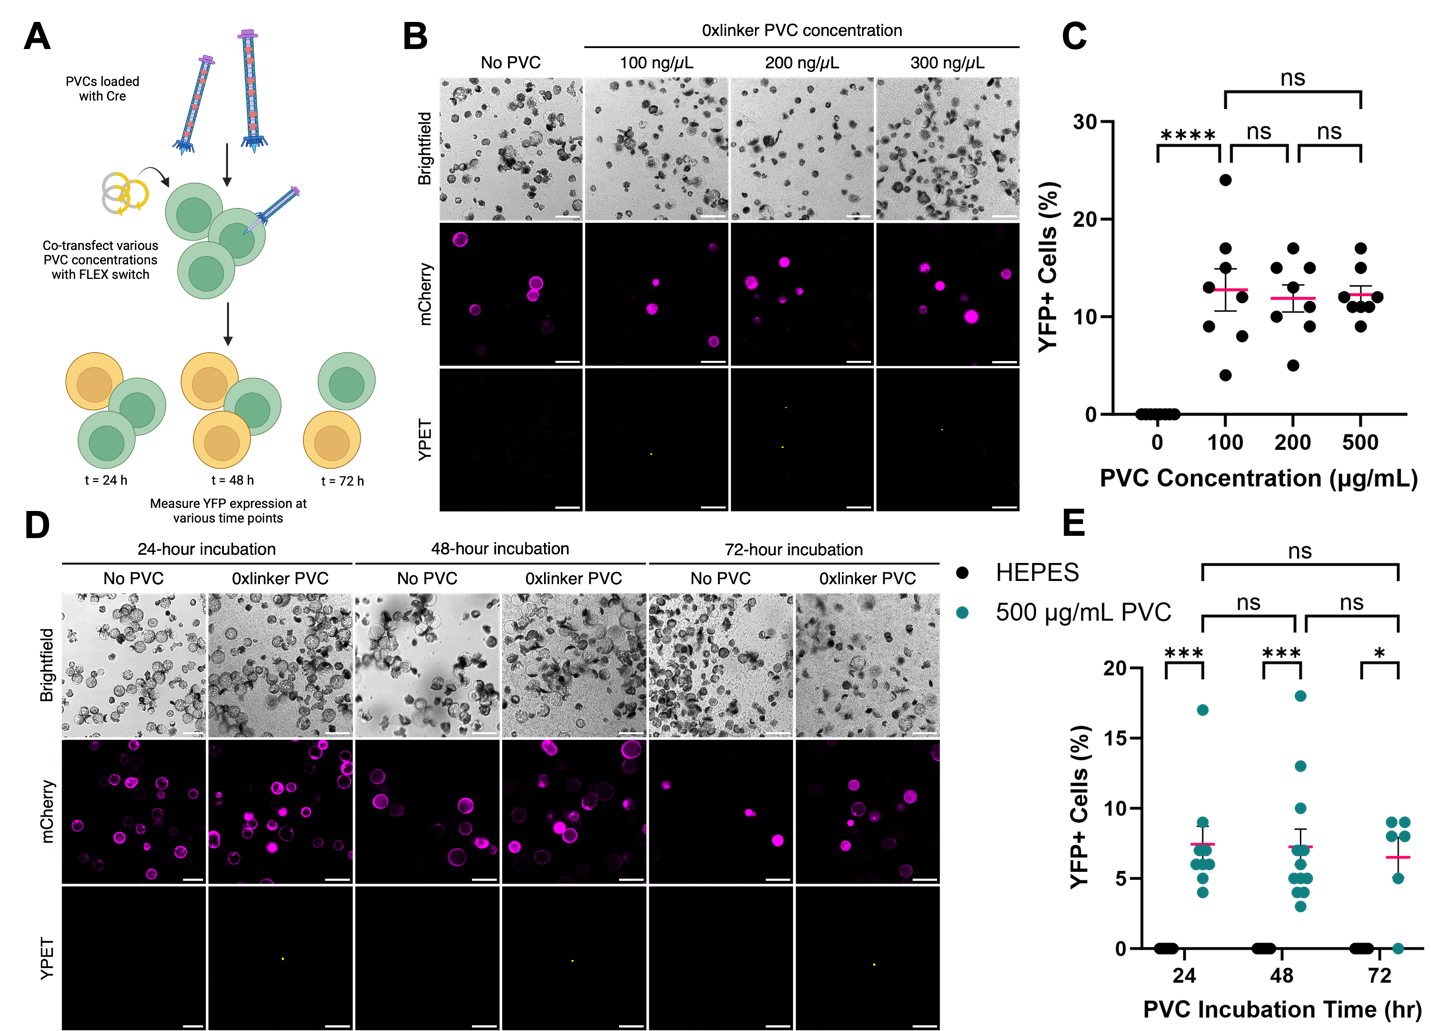


**Supplementary Figure 4. Optimizing experimental parameters for PVC delivery assays. (A)** Schematic applying the Cre delivery assay to screen for optimal PVC concentrations and incubation times in *A. thaliana* protoplasts. **(B)** Representative confocal microscopy images of *A. thaliana* protoplasts harboring the FLEX vector and challenged with the 0xlinker PVC variant at different concentrations. Scale bar, 100 µm. **(C)** Quantification of percentage of YFP+ cells from confocal images in **B** for HEPES buffer control, and 100, 200, and 500 μg/mL 0xlinker PVC challenge. **(D)** Representative confocal microscopy images of *A. thaliana* protoplasts harboring the FLEX vector and challenged with 500 μg/mLof the 0xlinker PVC variant. Images were captured at 24 h-increment time points. Scale bar, 100 µm. **(E)** Quantification of percentage of YFP+ cells from confocal images in **D**. At every time point, a 500 μg/mL0xlinker PVC experimental sample is compared to a HEPES buffer control. Data in **C**, **E** are mean ± SEM with n = 8 (**C**) or n > 5 (**E**)technical replicates, one-way ANOVA with Tukey post hoc test. *P < 0.05, ***P < 0.001 and ****P < 0.0001. ns, not significant.


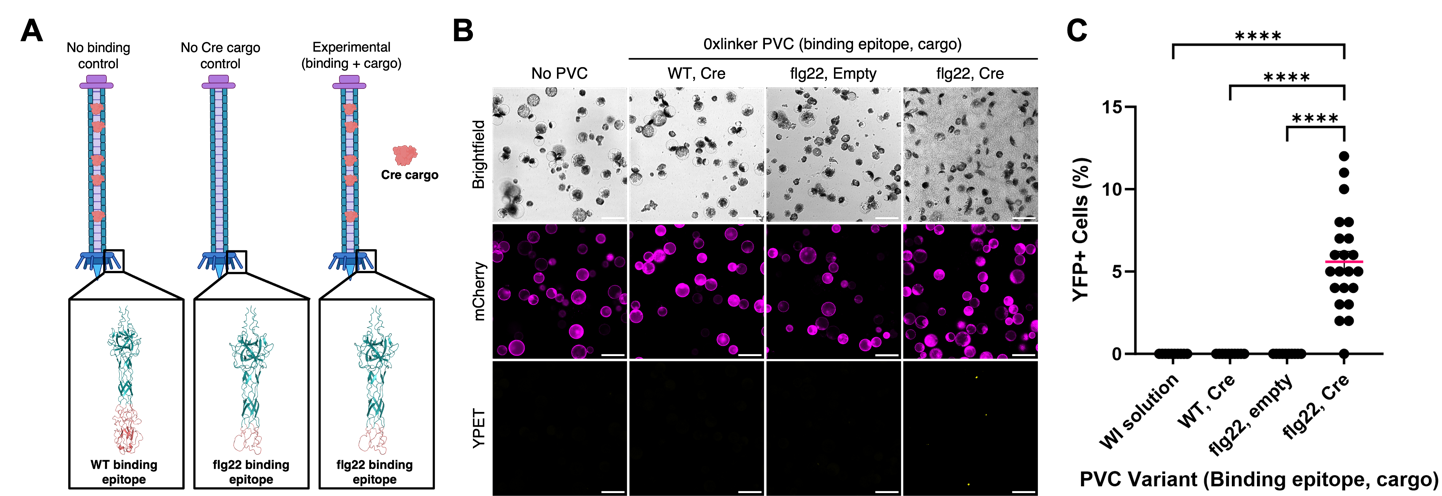


**Supplementary Figure 5. The flg22 binding epitope is required for PVC activity in plant cells. (A)** Illustration of the PVC variants required to provide proper controls for all Cre-delivery experiments. A no binding control probes the function of the flg22 epitope, and a no cargo control probes the function of the Cre cargo. **(B)** Representative confocal microscopy images of *A. thaliana* protoplasts harboring the FLEX vector and challenged with500 μg/mLPVC variants from panel **A**. Scale bar, 100 µm. **(C)** Quantification of percentage of YFP+ cells from confocal images for WI solution control, no binding control, no cargo control, and a 0xlinker PVC experimental sample. Data are mean ± SEM with n > 10 technical replicates, one-way ANOVA with Tukey post hoc test. ****P < 0.0001.
