# Supplementary material for: Extracellular contractile injection systems for high efficiency protein delivery to plants
Source: Research Square preprint supplement (doi:10.21203/rs.3.rs-7412028/v1), 2025-08-26
Supplement: Supplementary file 2 [file dc18f3d287b62a0899f371c8.xlsx]

## Sheet: Supplementary Table 1
Supplementary Table 1. All constructs used in the study.
FLEX Reporter constructs
Plasmid name	Backbone_Inserts_Resistance	Description	Origin	Addgene ID
pGMLxKN2042	pCk3_[p35S_TMVomega-Lox2272-LoxP-antiYFP-N7NLS-antiLox2272-antiLoxP_tHSP]F_[pCmYLCV6_mCherry_tNOS]R_KanR	YFP FLEX reporter with p35S promoter and Arabidopsis heat shock protein 18.2 terminator + mCherry transformation control with CmYLCV6 promoter and NOS terminator.	This study
pGMLxKN2051	pCk3_LIR_[p35S_TMVomega-Lox2272-LoxP-antiYFP-N7NLS-antiLox2272-antiLoxP_tHSP]F_SIR-RepA-LIR_[pCmYLCV6_mCherry_tNOS]R_KanR	YFP FLEX reporter (flanked by geminiviral components: LIR and SIR-RepA-LIR) with p35S promoter and Arabidopsis heat shock protein 18.2 terminator + mCherry transformation control with CmYLCV6 promoter and NOS terminator.	This study
pGMLxKN2039	pCk1_[pCmYLCV6_Cre_tHSP]F_[pCmYLCV6_mTurq_tNOS]R_KanR	Constitutive Cre recombinase expression with pCmYLCV6 promoter and Arabidopsis heat shock protein 18.2 terminator + mTurquois2 transformation control with pCmYLCV6 promoter and NOT terminator.	This study
PVC structural constructs
Plasmid name	Backbone_Inserts_Resistance	Description	Origin	Addgene ID
pGMLxKN2001	pAWP78_[PVCpnf1-16]F_KanR	Expresses structural components of PVCpnf gene locus. Pvc13 has WT binding domain.	Kreitz et al. (2023)	198271
pGMLxKN2003	pAWP78_[PVCpnf1-12-pnf13flg22-pnf14-16]F_KanR	Expresses structural components of PVCpnf gene locus. Pvc13 has flg22 binding domain.	This study, adapted from Kreitz et al. (2023)
pGMLxKN2030	pAWP78_[PVCpnf1-12-pnf13linker2xflg22-pnf14-16]F_KanR	Expresses structural components of PVCpnf gene locus. Pvc13 has flg22 binding domain flanked by (GGSGG)n=2 linkers.	This study, adapted from Kreitz et al. (2023)
pGMLxKN2031	pAWP78_[PVCpnf1-12-pnf13linker4xflg22-pnf14-16]F_KanR	Expresses structural components of PVCpnf gene locus. Pvc13 has flg22 binding domain flanked by (GGSGG)n=4 linkers.	This study, adapted from Kreitz et al. (2023)
PVC cargo constructs
Plasmid name	Backbone_Inserts_Resistance	Description	Origin	Addgene ID
pGMLxAM2002	pBR322_[PVCpnf17-22]F_AmpR	Expresses accessory components of PVCpnf gene locus. Includes Pnf and Pdp1 native toxin cargoes.	Kreitz et al. (2023)	198272
pGMLxCM2018	pBR322DeltaBsaI_[PVCpnf17-22-EmptyPayloadDeltaToxin]F_AmpR	Expresses accessory components of PVCpnf gene locus. Native toxin cargoes removed.	This study, adapted from Kreitz et al. (2023)
pGMLxAM2066	pBR322DeltaBsaI_[PVCpnf17-22-BP-mScarlet-HiBiT-EmptyPayloadDeltaToxin]F_AmpR	Expresses accessory components of PVCpnf gene locus. Native toxin cargoes removed. mScarlet cargo inserted in place of Pnf toxin	This study, adapted from Kreitz et al. (2023)
pGMLxAM2041	pBR322DeltaBsaI_[PVCpnf17-22-BP-Cre-HiBiT-DeltaToxin]F_AmpR	Expresses accessory components of PVCpnf gene locus. Native toxin cargoes removed. Cre cargo inserted in place of Pnf toxin	This study, adapted from Kreitz et al. (2023)
FLS2 over-expression constructs
Plasmid name	Backbone_Inserts_Resistance	Description	Origin	Addgene ID
pGMLxKN2048	pCAMBIA_[pFLS2_FLS2-3xmyc-GFP_tHSP]F_KanR	FLS2 membrane receptor over-expression under the native pFLS2 promoter and tFLS2 terminator. FLS is tagged on the C-terminus with a GFP fluorescent protein. The tag is a 3xMyc linker.	Robatzek et al. (2006)	86157
pGMLxKN2051	pCk1_[p35S_FLS2-3xmyc-GFP_tOCS]F_KanR	FLS2 membrane receptor over-expression under the p35S promoter and tOCS terminator. FLS is tagged on the C-terminus with a GFP fluorescent protein. The tag is a 3xMyc linker.	This study
